# Supplementary material for: Polycyclic Aromatic Hydrocarbons (PAHs) in the Dissolved Phase, Particulate Matter, and Sediment of the Sele River, Southern Italy: A Focus on Distribution, Risk Assessment, and Sources
Source: MDPI journal article supplement (doi:10.3390/toxics10070401), 2022-07-19
Supplement: s1 [file s1]

# Polycyclic Aromatic Hydrocarbons (PAHs) in the Dissolved Phase, Particulate Matter, and Sediment of the Sele River, Southern Italy: A Focus on Distribution, Risk Assessment, and Sources

Paolo Montuori <sup>1,\*</sup>, Elvira De Rosa <sup>1</sup>, Fabiana Di Duca <sup>1</sup>, Bruna De Simone <sup>1</sup>, Stefano Scippa <sup>1</sup>, Immacolata Russo <sup>1</sup>, Pasquale Sarnacchiaro <sup>2</sup> and Maria Triassi <sup>1</sup>

**Table S1.** Individual PAHs recovery values

| PAHs                                  | Recovery % |
|---------------------------------------|------------|
| Naphthalene                           | 88         |
| Acenaphthylene                        | 82         |
| Acenaphthene                          | 89         |
| Fluorine                              | 80         |
| Anthracene                            | 86         |
| Phenanthrene                          | 84         |
| Fluoranthene                          | 80         |
| Pyrene                                | 80         |
| Benz(a)anthracene                     | 88         |
| Chrysene                              | 80         |
| Benzo(b)fluoranthene                  | 94         |
| Benzo(k)fluoranthene                  | 94         |
| Benzo(a)pyrene                        | 97         |
| Indeno(1,2,3-cd)pyrene                | 89         |
| Dibenz(a,h) anthracene                | 91         |
| Benzo(g,h,i) perylene                 | 96         |
| Benzo(a)pyrene <sub>d12</sub>         | 94         |
| Indeno(1,2,3-cd)pyrene <sub>d12</sub> | 91         |

**Table S2.** Characteristic Ions of the analyzed PAHs

| Compound               | Primary Ion | Secondary Ion |
|------------------------|-------------|---------------|
| Naphthalene            | 128.10      | 64.00         |
| Acenaphthylene         | 152.10      | 76.10         |
| Acenaphthene           | 154.20      | -             |
| Fluorine               | 166.10      | 164.10        |
| Anthracene             | 178.10      | 89.10         |
| Phenanthrene           | 178.10      | 89.10         |
| Fluoranthene           | 202.10      | 101.10        |
| Pyrene                 | 202.10      | 101.10        |
| Benz(a)anthracene      | 228.10      | 114.10        |
| Chrysene               | 228.10      | 114.10        |
| Benzo(b)fluoranthene   | 252.20      | 126.20        |
| Benzo(k)fluoranthene   | 252.20      | 126.20        |
| Benzo(a)pyrene         | 252.10      | 126.10        |
| Indeno(1,2,3-cd)pyrene | 276.20      | 138.10        |
| Dibenz(a,h) anthracene | 278.20      | 139.20        |
| Benzo(g,h,i) perylene  | 276.20      | 138.10        |

**Table S3.** Parameter of GC-MS system

| Parameter                    | Set Condition                                          |
|------------------------------|--------------------------------------------------------|
| Gas Chromatography (GC)      | TRACE <sup>TM</sup> 1310                               |
| Injection volume             | 1 µL                                                   |
| Inlet temperature            | 300 °C                                                 |
| Capillary column             | TG-5MS (30 mm ×0.25 mm inner diameter × 0.25 µm film ) |
| Injection mode               | Splitless                                              |
| Carrier gas                  | Helium, 1mL/min                                        |
| Mass selective detector (MS) | ISQ <sup>TM</sup> 7000 Single Quadrupole Mass          |
| Ionization Mode              | Electron Ionization (EI)                               |
| Transfer Line Temperature    | 280°C                                                  |
| Ion source Temperature       | 230°C                                                  |
| Electronic energy            | 70 eV                                                  |
| Scan mode                    | Selective Ion Monitoring (SIM)                         |

**Table S4.** Validation parameter values of PAHs in water samples and SPM samples

| PAHs Compound          | Linearity<br>(R <sup>2</sup> ) | LOD<br>(ppb) | LOQ<br>(ppb) |
|------------------------|--------------------------------|--------------|--------------|
| Naphthalene            | 0.993                          | 1.57         | 5.25         |
| Acenaphthylene         | 0.998                          | 1.50         | 5.01         |
| Acenaphthene           | 0.995                          | 1.53         | 5.10         |
| Fluorine               | 0.994                          | 1.46         | 4.87         |
| Anthracene             | 0.992                          | 1.53         | 5.11         |
| Phenanthrene           | 0.993                          | 1.55         | 5.30         |
| Fluoranthene           | 0.994                          | 1.31         | 5.20         |
| Pyrene                 | 0.996                          | 1.48         | 4.90         |
| Benz(a)anthracene      | 0.997                          | 1.52         | 4.80         |
| Chrysene               | 0.995                          | 1.54         | 5.10         |
| Benzo(b)fluoranthene   | 0.996                          | 1.44         | 5.00         |
| Benzo(k)fluoranthene   | 0.998                          | 1.50         | 5.11         |
| Benzo(a)pyrene         | 0.993                          | 1.59         | 5.30         |
| Indeno(1,2,3-cd)pyrene | 0.999                          | 1.31         | 4.81         |
| Dibenz(a,h) anthracene | 0.999                          | 1.42         | 5.31         |
| Benzo(g,h,i) perylene  | 0.992                          | 1.62         | 5.40         |

**Table S5.** Validation parameter values of PAHs in Sediment samples

| PAHs Compound        | Linearity<br>(R <sup>2</sup> ) | LOD<br>(ppb) | LOQ<br>(ppb) |
|----------------------|--------------------------------|--------------|--------------|
| Naphthalene          | 0.993                          | 1.63         | 5.44         |
| Acenaphthylene       | 0.998                          | 1.90         | 6.30         |
| Acenaphthene         | 0.995                          | 1.55         | 5.17         |
| Fluorine             | 0.994                          | 1.86         | 6.23         |
| Anthracene           | 0.992                          | 1.56         | 5.21         |
| Phenanthrene         | 0.993                          | 1.59         | 5.30         |
| Fluoranthene         | 0.994                          | 1.65         | 5.50         |
| Pyrene               | 0.996                          | 1.83         | 6.10         |
| Benz(a)anthracene    | 0.997                          | 1.56         | 5.20         |
| Chrysene             | 0.995                          | 1.80         | 6.0          |
| Benzo(b)fluoranthene | 0.996                          | 1.62         | 5.41         |
| Benzo(k)fluoranthene | 0.998                          | 1.61         | 5.39         |
| Benzo(a)pyrene       | 0.993                          | 1.64         | 5.48         |

|                        |       |      |      |
|------------------------|-------|------|------|
| Indeno(1,2,3-cd)pyrene | 0.999 | 1.82 | 6.08 |
| Dibenz(a,h) anthracene | 0.999 | 1.71 | 5.71 |
| Benzo(g,h,i) perylene  | 0.992 | 1.70 | 5.68 |

**Table S6.** Description of concentration of PAHs in water dissolved phase (DP) samples of the Sele River, southern Italy.

|                                       | Nap   | Acy   | Ace   | Flu   | Phe    | An    | Fl    | Pyr   | BaA   | Chr   | BbF   | BkF   | BaP   | DahA  | BghiP | InP   |
|---------------------------------------|-------|-------|-------|-------|--------|-------|-------|-------|-------|-------|-------|-------|-------|-------|-------|-------|
| <b>November</b>                       |       |       |       |       |        |       |       |       |       |       |       |       |       |       |       |       |
| River Mouth (sea water)               | 89,29 | 44,15 | 34,57 | 39,76 | 46,57  | 54,76 | 35,66 | 39,88 | 20,45 | 12,69 | 12,74 | 10,90 | 21,90 | 5,18  | 10,45 | 8,38  |
| Nord estuary at 500mt (sea water)     | 80,45 | 25,63 | 32,88 | 31,77 | 45,69  | 53,15 | 74,68 | 37,36 | 12,76 | 6,27  | 5,65  | 8,24  | 36,87 | 1,49  | 6,75  | 11,52 |
| Nord estuary at 1000mt (sea water)    | 45,12 | 12,10 | 26,49 | 44,87 | 90,11  | 38,70 | 65,38 | 34,73 | 6,64  | 3,29  | 2,38  | 5,14  | 28,82 | 1,57  | 7,03  | 12,01 |
| Nord estuary at 1500mt (sea water)    | 22,25 | 12,71 | 19,79 | 16,84 | 77,44  | 34,10 | 32,48 | 17,44 | 8,47  | 1,43  | 2,62  | 3,96  | 18,29 | 1,80  | 7,54  | 12,62 |
| Central estuary at 500mt (sea water)  | 80,41 | 14,65 | 24,98 | 32,98 | 37,19  | 75,88 | 25,90 | 34,99 | 17,86 | 9,06  | 7,87  | 9,33  | 14,77 | 2,34  | 7,43  | 12,58 |
| Central estuary at 1000mt (sea water) | 69,42 | 12,20 | 46,85 | 52,86 | 103,57 | 42,00 | 75,93 | 45,43 | 11,10 | 3,86  | 2,48  | 7,77  | 34,64 | 1,69  | 7,28  | 12,26 |
| Central estuary at 1500mt (sea water) | 46,53 | 12,04 | 32,75 | 33,84 | 92,01  | 49,41 | 63,10 | 22,38 | 9,99  | 3,09  | 2,38  | 5,80  | 30,91 | 1,51  | 7,14  | 11,95 |
| South estuary at 500mt (sea water)    | 95,09 | 25,22 | 56,39 | 48,75 | 37,57  | 45,77 | 37,49 | 36,88 | 31,38 | 29,41 | 9,05  | 8,58  | 21,79 | 8,65  | 7,33  | 9,88  |
| South estuary at 1000mt (sea water)   | 56,10 | 12,46 | 52,14 | 45,77 | 55,63  | 62,61 | 79,87 | 41,35 | 11,48 | 7,34  | 6,25  | 7,23  | 44,29 | 2,44  | 6,58  | 11,08 |
| South estuary at 1500mt (sea water)   | 61,13 | 12,59 | 38,27 | 52,32 | 93,23  | 53,31 | 75,36 | 29,59 | 9,49  | 4,90  | 4,72  | 6,17  | 46,89 | 1,55  | 7,32  | 12,26 |
| <b>February</b>                       |       |       |       |       |        |       |       |       |       |       |       |       |       |       |       |       |
| River Mouth (sea water)               | 40,62 | 13,79 | 14,47 | 19,09 | 6,99   | 13,50 | 23,87 | 19,04 | 34,68 | 9,11  | 7,15  | 16,78 | 24,70 | 8,56  | 24,98 | 32,65 |
| Nord estuary at 500mt (sea water)     | 18,02 | 13,14 | 10,63 | 19,41 | 11,01  | 13,74 | 20,98 | 10,93 | 15,61 | 7,42  | 5,05  | 7,62  | 13,63 | 5,49  | 11,74 | 15,58 |
| Nord estuary at 1000mt (sea water)    | 11,06 | 12,02 | 4,06  | 16,25 | 3,56   | 5,74  | 7,42  | 5,26  | 9,47  | 4,86  | 3,31  | 5,37  | 9,58  | 3,80  | 8,14  | 12,02 |
| Nord estuary at 1500mt (sea water)    | 2,46  | 0,24  | 0,85  | 0,35  | 0,29   | 0,66  | 0,87  | 0,47  | 1,00  | 0,77  | 0,88  | 0,99  | 0,18  | 0,10  | 0,01  | 0,10  |
| Central estuary at 500mt (sea water)  | 29,08 | 11,85 | 20,03 | 31,11 | 38,70  | 26,43 | 41,68 | 22,41 | 16,78 | 7,98  | 6,31  | 7,16  | 36,12 | 6,43  | 16,83 | 12,95 |
| Central estuary at 1000mt (sea water) | 19,11 | 12,26 | 15,18 | 20,56 | 29,29  | 12,97 | 29,04 | 13,48 | 9,48  | 4,11  | 5,54  | 4,88  | 33,41 | 12,01 | 14,15 | 14,27 |
| Central estuary at 1500mt (sea water) | 7,58  | 11,96 | 7,31  | 11,67 | 15,99  | 8,22  | 15,53 | 10,38 | 8,36  | 3,50  | 3,47  | 4,43  | 28,45 | 8,70  | 11,52 | 18,89 |
| South estuary at 500mt (sea water)    | 34,40 | 15,39 | 28,40 | 30,37 | 38,91  | 28,50 | 17,39 | 10,04 | 11,48 | 11,24 | 9,63  | 7,57  | 41,03 | 9,54  | 16,46 | 23,76 |
| South estuary at 1000mt (sea water)   | 20,46 | 12,06 | 21,79 | 19,30 | 23,24  | 18,52 | 30,14 | 18,02 | 8,50  | 7,95  | 7,65  | 7,61  | 30,81 | 7,61  | 14,15 | 14,59 |
| South estuary at 1500mt (sea water)   | 11,93 | 11,33 | 16,02 | 16,96 | 11,70  | 18,24 | 24,14 | 16,36 | 8,09  | 5,57  | 6,56  | 5,23  | 28,67 | 2,83  | 11,84 | 11,67 |
| <b>April</b>                          |       |       |       |       |        |       |       |       |       |       |       |       |       |       |       |       |
| River Mouth (sea water)               | 79,26 | 33,64 | 32,98 | 31,75 | 40,87  | 39,98 | 40,76 | 30,98 | 20,22 | 13,46 | 14,29 | 10,55 | 8,99  | 5,95  | 9,31  | 6,35  |
| Nord estuary at 500mt (sea water)     | 65,46 | 12,36 | 18,49 | 11,47 | 10,48  | 13,57 | 14,36 | 10,48 | 9,36  | 4,51  | 4,30  | 7,46  | 6,47  | 4,83  | 5,37  | 5,28  |
| Nord estuary at 1000mt (sea water)    | 63,37 | 29,27 | 37,47 | 25,47 | 21,34  | 19,37 | 23,58 | 23,47 | 8,56  | 3,66  | 10,03 | 6,49  | 5,68  | 8,58  | 7,29  | 15,87 |
| Nord estuary at 1500mt (sea water)    | 52,33 | 25,69 | 29,25 | 27,13 | 20,58  | 26,63 | 34,94 | 23,41 | 10,71 | 2,56  | 4,25  | 9,97  | 14,25 | 2,59  | 6,55  | 9,38  |
| Central estuary at 500mt (sea water)  | 40,26 | 14,86 | 20,60 | 11,25 | 19,16  | 16,59 | 20,59 | 11,47 | 16,59 | 13,36 | 7,25  | 8,88  | 6,57  | 6,41  | 5,90  | 6,86  |

|                                       |       |       |       |       |       |       |       |       |       |       |       |       |       |       |       |       |
|---------------------------------------|-------|-------|-------|-------|-------|-------|-------|-------|-------|-------|-------|-------|-------|-------|-------|-------|
| Central estuary at 1000mt (sea water) | 38,26 | 14,86 | 20,60 | 11,25 | 19,16 | 16,59 | 24,03 | 12,47 | 17,59 | 14,36 | 8,25  | 7,88  | 7,27  | 7,41  | 7,90  | 4,86  |
| Central estuary at 1500mt (sea water) | 42,06 | 22,03 | 24,03 | 25,03 | 27,26 | 15,26 | 19,03 | 16,03 | 15,20 | 18,98 | 7,06  | 6,99  | 6,25  | 5,05  | 6,56  | 4,99  |
| South estuary at 500mt (sea water)    | 85,29 | 42,15 | 36,57 | 37,76 | 44,57 | 55,76 | 35,66 | 40,88 | 20,45 | 11,69 | 10,74 | 10,90 | 21,90 | 6,18  | 9,45  | 8,38  |
| South estuary at 1000mt (sea water)   | 62,62 | 13,79 | 14,47 | 19,09 | 26,99 | 13,50 | 20,87 | 19,04 | 14,68 | 7,11  | 5,15  | 16,78 | 16,70 | 13,56 | 24,98 | 20,25 |
| South estuary at 1500mt (sea water)   | 58,26 | 25,63 | 32,88 | 31,77 | 45,69 | 53,15 | 74,68 | 37,36 | 25,76 | 10,27 | 5,65  | 8,24  | 36,87 | 1,49  | 12,75 | 11,52 |
| <b>July</b>                           |       |       |       |       |       |       |       |       |       |       |       |       |       |       |       |       |
| River Mouth (sea water)               | 87,03 | 69,55 | 55,02 | 58,03 | 46,25 | 49,05 | 50,02 | 41,25 | 19,42 | 14,81 | 16,88 | 13,62 | 11,26 | 9,34  | 14,26 | 11,42 |
| Nord estuary at 500mt (sea water)     | 69,05 | 36,27 | 31,25 | 36,26 | 38,16 | 48,26 | 34,26 | 31,18 | 12,50 | 11,18 | 9,48  | 9,91  | 8,29  | 6,30  | 8,03  | 7,88  |
| Nord estuary at 1000mt (sea water)    | 89,29 | 44,15 | 44,57 | 40,76 | 46,57 | 54,76 | 35,66 | 39,88 | 20,45 | 12,69 | 12,74 | 10,90 | 11,90 | 11,18 | 12,45 | 9,38  |
| Nord estuary at 1500mt (sea water)    | 19,07 | 11,06 | 7,88  | 7,60  | 8,58  | 9,47  | 9,75  | 7,90  | 9,88  | 3,43  | 2,99  | 1,29  | 3,88  | 2,39  | 4,19  | 3,06  |
| Central estuary at 500mt (sea water)  | 80,03 | 65,55 | 52,02 | 60,03 | 44,25 | 45,05 | 50,02 | 40,25 | 30,42 | 20,81 | 15,88 | 10,62 | 10,26 | 9,34  | 11,26 | 6,52  |
| Central estuary at 1000mt (sea water) | 79,85 | 42,15 | 46,57 | 47,76 | 44,57 | 55,76 | 35,66 | 40,88 | 20,45 | 16,69 | 10,74 | 10,90 | 21,90 | 6,18  | 9,25  | 9,08  |
| Central estuary at 1500mt (sea water) | 70,06 | 22,03 | 24,03 | 25,03 | 27,26 | 30,26 | 29,03 | 23,03 | 21,20 | 18,98 | 7,06  | 6,99  | 7,25  | 5,05  | 6,56  | 7,49  |
| South estuary at 500mt (sea water)    | 80,03 | 69,55 | 55,02 | 58,03 | 46,25 | 49,05 | 50,02 | 41,25 | 19,42 | 14,81 | 16,88 | 13,62 | 11,26 | 9,34  | 14,26 | 11,42 |
| South estuary at 1000mt (sea water)   | 85,29 | 44,15 | 37,57 | 41,76 | 46,57 | 50,76 | 41,66 | 40,88 | 22,45 | 12,69 | 12,74 | 12,90 | 21,90 | 6,18  | 13,25 | 8,48  |
| South estuary at 1500mt (sea water)   | 80,29 | 42,15 | 36,57 | 37,76 | 45,57 | 55,76 | 41,66 | 40,88 | 21,45 | 11,69 | 11,74 | 12,90 | 21,90 | 7,18  | 13,45 | 8,38  |

**Table S7.** Description of concentration of PAHs in suspended particulate matter (SPM) samples of the Sele River, southern Italy.

|                                       | Nap   | Acy   | Ace   | Flu   | Phe   | An    | Fl    | Pyr   | BaA   | Chr   | BbF   | BkF   | BaP   | DahA  | BghiP | InP   |
|---------------------------------------|-------|-------|-------|-------|-------|-------|-------|-------|-------|-------|-------|-------|-------|-------|-------|-------|
| <b>November</b>                       |       |       |       |       |       |       |       |       |       |       |       |       |       |       |       |       |
| River Mouth (sea water)               | 10,24 | 11,48 | 15,20 | 21,95 | 10,52 | 13,47 | 27,80 | 14,55 | 10,71 | 3,65  | 14,29 | 8,49  | 31,43 | 15,36 | 12,84 | 12,84 |
| Nord estuary at 500mt (sea water)     | 9,88  | 7,26  | 8,57  | 9,97  | 8,75  | 6,85  | 7,58  | 10,73 | 8,42  | 8,80  | 11,79 | 6,72  | 10,69 | 6,63  | 8,58  | 7,26  |
| Nord estuary at 1000mt (sea water)    | 10,47 | 13,76 | 12,43 | 17,75 | 14,25 | 10,55 | 10,59 | 9,36  | 15,46 | 8,76  | 16,24 | 11,15 | 14,21 | 10,16 | 15,26 | 14,16 |
| Nord estuary at 1500mt (sea water)    | 12,37 | 10,26 | 8,57  | 9,97  | 15,75 | 13,85 | 17,58 | 15,73 | 10,42 | 15,80 | 11,79 | 12,72 | 17,69 | 16,63 | 18,58 | 12,26 |
| Central estuary at 500mt (sea water)  | 5,88  | 6,26  | 8,57  | 7,97  | 8,75  | 6,85  | 7,58  | 10,73 | 8,42  | 8,80  | 11,79 | 6,72  | 10,69 | 5,63  | 8,58  | 5,16  |
| Central estuary at 1000mt (sea water) | 13,21 | 12,77 | 9,15  | 22,33 | 11,27 | 12,03 | 15,10 | 11,34 | 19,65 | 6,68  | 5,05  | 7,33  | 17,31 | 5,10  | 11,23 | 11,17 |
| Central estuary at 1500mt (sea water) | 12,26 | 11,49 | 12,63 | 18,41 | 11,54 | 10,74 | 13,61 | 12,25 | 14,03 | 6,42  | 12,05 | 7,02  | 12,26 | 7,01  | 11,27 | 12,24 |
| South estuary at 500mt (sea water)    | 10,21 | 9,77  | 9,15  | 22,33 | 11,27 | 12,03 | 15,10 | 11,34 | 19,65 | 6,68  | 5,05  | 7,33  | 10,01 | 6,10  | 14,03 | 11,17 |
| South estuary at 1000mt (sea water)   | 15,92 | 11,17 | 12,57 | 22,63 | 10,10 | 9,65  | 9,88  | 9,47  | 18,22 | 7,38  | 5,55  | 8,44  | 14,75 | 7,22  | 10,26 | 15,01 |
| South estuary at 1500mt (sea water)   | 11,21 | 11,68 | 10,83 | 16,66 | 13,19 | 9,56  | 12,78 | 10,30 | 16,04 | 5,99  | 4,08  | 6,31  | 15,66 | 7,26  | 14,71 | 6,93  |
| <b>February</b>                       |       |       |       |       |       |       |       |       |       |       |       |       |       |       |       |       |
| River Mouth (sea water)               | 37,01 | 34,09 | 32,78 | 43,16 | 35,12 | 39,59 | 32,93 | 30,25 | 32,25 | 37,05 | 42,36 | 53,03 | 52,15 | 57,02 | 47,03 | 49,02 |
| Nord estuary at 500mt (sea water)     | 34,46 | 14,78 | 31,43 | 25,05 | 24,03 | 27,06 | 25,06 | 25,37 | 16,69 | 11,76 | 14,26 | 11,03 | 31,05 | 32,03 | 29,06 | 28,03 |

|                                       |       |       |       |       |       |       |       |       |       |       |       |       |       |       |       |       |
|---------------------------------------|-------|-------|-------|-------|-------|-------|-------|-------|-------|-------|-------|-------|-------|-------|-------|-------|
| Nord estuary at 1000mt (sea water)    | 20,59 | 12,34 | 16,93 | 20,51 | 26,24 | 13,03 | 30,54 | 14,55 | 11,42 | 4,41  | 5,14  | 7,81  | 38,61 | 14,09 | 23,15 | 18,39 |
| Nord estuary at 1500mt (sea water)    | 11,33 | 11,24 | 12,52 | 20,36 | 22,81 | 7,26  | 24,42 | 10,58 | 10,50 | 2,04  | 2,79  | 6,05  | 13,63 | 11,30 | 12,39 | 13,12 |
| Central estuary at 500mt (sea water)  | 20,77 | 23,02 | 26,36 | 33,57 | 30,26 | 38,36 | 34,87 | 40,26 | 32,07 | 21,06 | 50,59 | 52,03 | 51,03 | 45,15 | 42,58 | 47,96 |
| Central estuary at 1000mt (sea water) | 23,02 | 15,71 | 37,22 | 34,79 | 35,26 | 23,46 | 26,93 | 24,19 | 17,94 | 10,94 | 32,05 | 32,02 | 40,83 | 28,20 | 39,55 | 39,03 |
| Central estuary at 1500mt (sea water) | 16,30 | 11,58 | 17,48 | 20,85 | 28,70 | 12,92 | 29,09 | 14,85 | 19,78 | 4,80  | 5,45  | 38,05 | 33,08 | 43,03 | 37,17 | 36,02 |
| South estuary at 500mt (sea water)    | 22,72 | 17,38 | 33,24 | 33,46 | 30,61 | 28,27 | 32,47 | 31,97 | 33,58 | 27,03 | 35,06 | 38,06 | 46,65 | 35,08 | 34,02 | 28,03 |
| South estuary at 1000mt (sea water)   | 26,27 | 12,58 | 34,89 | 32,91 | 32,79 | 23,96 | 25,54 | 24,47 | 16,85 | 12,69 | 42,04 | 43,02 | 48,21 | 28,02 | 21,45 | 26,05 |
| South estuary at 1500mt (sea water)   | 15,72 | 12,70 | 18,79 | 20,61 | 27,92 | 14,82 | 31,61 | 15,17 | 25,48 | 3,38  | 5,39  | 9,13  | 30,30 | 15,66 | 14,50 | 16,73 |
| <b>April</b>                          |       |       |       |       |       |       |       |       |       |       |       |       |       |       |       |       |
| River Mouth (sea water)               | 30,59 | 14,82 | 28,87 | 32,82 | 33,60 | 29,35 | 36,03 | 37,47 | 35,47 | 36,47 | 32,74 | 31,47 | 43,13 | 36,48 | 32,26 | 28,47 |
| Nord estuary at 500mt (sea water)     | 5,32  | 12,37 | 9,87  | 20,55 | 30,84 | 14,77 | 58,26 | 19,88 | 8,01  | 4,83  | 14,38 | 22,43 | 23,47 | 34,47 | 27,27 | 25,57 |
| Nord estuary at 1000mt (sea water)    | 4,47  | 20,37 | 14,13 | 24,76 | 27,38 | 12,43 | 52,37 | 17,37 | 12,69 | 10,37 | 23,27 | 24,43 | 29,32 | 32,27 | 30,64 | 34,07 |
| Nord estuary at 1500mt (sea water)    | 16,30 | 11,58 | 17,48 | 20,85 | 28,70 | 12,92 | 29,09 | 14,85 | 19,78 | 4,80  | 10,45 | 34,05 | 33,08 | 40,03 | 39,17 | 34,82 |
| Central estuary at 500mt (sea water)  | 10,47 | 13,76 | 12,43 | 17,75 | 14,25 | 8,55  | 10,59 | 9,36  | 15,46 | 8,76  | 16,24 | 11,15 | 24,21 | 20,16 | 16,26 | 24,56 |
| Central estuary at 1000mt (sea water) | 10,51 | 25,47 | 27,22 | 31,86 | 29,37 | 21,58 | 32,70 | 22,00 | 21,66 | 4,34  | 3,75  | 11,34 | 41,85 | 5,73  | 13,86 | 25,47 |
| Central estuary at 1500mt (sea water) | 26,27 | 12,58 | 34,89 | 32,91 | 32,79 | 23,96 | 25,54 | 24,47 | 26,85 | 32,59 | 42,04 | 43,02 | 48,11 | 28,02 | 21,05 | 27,05 |
| South estuary at 500mt (sea water)    | 23,79 | 22,34 | 31,76 | 32,37 | 34,38 | 22,76 | 28,22 | 27,48 | 23,35 | 23,55 | 34,48 | 36,57 | 47,47 | 37,39 | 40,24 | 38,07 |
| South estuary at 1000mt (sea water)   | 16,54 | 10,26 | 33,12 | 31,71 | 35,47 | 26,48 | 32,85 | 28,04 | 29,54 | 21,76 | 20,57 | 19,76 | 44,22 | 36,17 | 40,27 | 40,28 |
| South estuary at 1500mt (sea water)   | 18,47 | 11,35 | 30,48 | 30,57 | 34,12 | 24,83 | 34,47 | 26,57 | 30,57 | 36,47 | 37,27 | 44,27 | 46,37 | 46,35 | 45,97 | 47,67 |
| <b>July</b>                           |       |       |       |       |       |       |       |       |       |       |       |       |       |       |       |       |
| River Mouth (sea water)               | 6,11  | 18,87 | 13,45 | 11,75 | 20,43 | 17,48 | 22,47 | 18,26 | 12,12 | 15,57 | 12,26 | 21,87 | 11,87 | 22,69 | 23,69 | 27,26 |
| Nord estuary at 500mt (sea water)     | 7,88  | 7,26  | 8,57  | 9,97  | 8,75  | 6,85  | 7,58  | 10,73 | 8,42  | 8,80  | 11,79 | 6,72  | 10,69 | 6,63  | 8,58  | 15,66 |
| Nord estuary at 1000mt (sea water)    | 4,25  | 6,26  | 7,25  | 8,51  | 8,53  | 8,61  | 7,26  | 9,13  | 7,25  | 2,88  | 6,14  | 6,05  | 9,03  | 10,40 | 11,65 | 12,21 |
| Nord estuary at 1500mt (sea water)    | 4,09  | 5,53  | 6,25  | 19,67 | 22,21 | 8,53  | 5,03  | 7,25  | 5,53  | 2,71  | 2,51  | 3,82  | 4,02  | 8,45  | 8,26  | 8,12  |
| Central estuary at 500mt (sea water)  | 8,15  | 10,24 | 18,21 | 9,02  | 11,02 | 15,40 | 18,02 | 10,25 | 10,22 | 7,05  | 8,02  | 9,06  | 12,02 | 8,03  | 12,02 | 15,41 |
| Central estuary at 1000mt (sea water) | 10,42 | 9,05  | 17,67 | 10,27 | 19,46 | 13,91 | 16,48 | 13,05 | 13,82 | 9,05  | 10,05 | 11,27 | 14,05 | 19,05 | 14,36 | 12,75 |
| Central estuary at 1500mt (sea water) | 13,21 | 12,77 | 9,15  | 22,33 | 11,27 | 12,03 | 15,10 | 11,34 | 19,65 | 6,68  | 5,05  | 17,33 | 23,01 | 18,10 | 21,23 | 22,17 |
| South estuary at 500mt (sea water)    | 7,24  | 24,95 | 22,74 | 23,91 | 22,43 | 17,33 | 23,60 | 21,26 | 15,03 | 9,56  | 10,26 | 13,44 | 16,06 | 6,75  | 13,03 | 14,33 |
| South estuary at 1000mt (sea water)   | 5,25  | 14,97 | 19,74 | 17,06 | 18,82 | 15,85 | 13,05 | 9,86  | 15,13 | 10,02 | 19,23 | 28,05 | 39,05 | 22,04 | 24,02 | 22,12 |
| South estuary at 1500mt (sea water)   | 16,30 | 23,58 | 17,48 | 20,85 | 28,70 | 12,92 | 29,09 | 14,85 | 19,78 | 4,80  | 15,45 | 34,05 | 33,08 | 40,03 | 39,17 | 37,22 |

**Table S8.** Description of concentration of PAHs in sediment samples of the Sele River, southern Italy.

|                                       | Nap   | Acy   | Ace   | Flu   | Phe   | An    | Fl    | Pyr   | BaA   | Chr   | BbF   | BkF    | BaP    | DahA   | BghiP | InP   |
|---------------------------------------|-------|-------|-------|-------|-------|-------|-------|-------|-------|-------|-------|--------|--------|--------|-------|-------|
| River Mouth (sea water)               | 28,37 | 22,05 | 33,73 | 40,17 | 53,14 | 34,12 | 77,68 | 58,39 | 45,23 | 39,62 | 81,43 | 42,25  | 104,74 | 73,55  | 58,45 | 78,25 |
| Nord estuary at 500mt (sea water)     | 8,11  | 26,62 | 19,92 | 27,22 | 30,30 | 30,71 | 39,30 | 20,35 | 24,37 | 29,60 | 87,49 | 87,31  | 89,66  | 107,35 | 68,63 | 15,52 |
| Nord estuary at 1000mt (sea water)    | 8,72  | 31,99 | 22,72 | 26,90 | 31,17 | 29,99 | 34,88 | 23,79 | 20,56 | 32,88 | 69,73 | 70,32  | 84,00  | 66,22  | 49,34 | 46,39 |
| Nord estuary at 1500mt (sea water)    | 7,81  | 10,88 | 12,18 | 15,70 | 18,52 | 16,93 | 16,42 | 8,19  | 19,38 | 14,68 | 36,88 | 36,00  | 47,04  | 52,99  | 11,29 | 6,86  |
| Central estuary at 500mt (sea water)  | 73,78 | 14,47 | 17,67 | 16,38 | 15,22 | 9,81  | 5,23  | 12,11 | 30,81 | 27,90 | 81,76 | 87,68  | 149,56 | 98,77  | 49,21 | 33,95 |
| Central estuary at 1000mt (sea water) | 7,49  | 13,52 | 15,11 | 16,35 | 17,25 | 20,37 | 41,04 | 11,81 | 21,61 | 26,00 | 95,85 | 109,78 | 157,86 | 129,76 | 6,87  | 17,46 |
| Central estuary at 1500mt (sea water) | 6,79  | 11,85 | 8,20  | 9,90  | 36,06 | 9,87  | 48,94 | 9,91  | 16,82 | 14,53 | 94,20 | 90,63  | 129,61 | 98,44  | 10,89 | 5,54  |
| South estuary at 500mt (sea water)    | 65,27 | 13,63 | 16,17 | 16,81 | 16,80 | 15,26 | 58,34 | 43,34 | 43,68 | 45,90 | 95,15 | 101,98 | 89,56  | 90,96  | 75,56 | 63,80 |
| South estuary at 1000mt (sea water)   | 7,36  | 10,26 | 16,22 | 17,19 | 17,18 | 15,61 | 41,62 | 15,06 | 22,79 | 25,68 | 98,91 | 90,79  | 99,51  | 146,57 | 68,88 | 50,69 |
| South estuary at 1500mt (sea water)   | 5,30  | 15,76 | 17,30 | 8,65  | 19,24 | 13,61 | 73,10 | 72,67 | 51,92 | 36,34 | 79,04 | 79,98  | 101,65 | 88,95  | 13,63 | 6,12  |

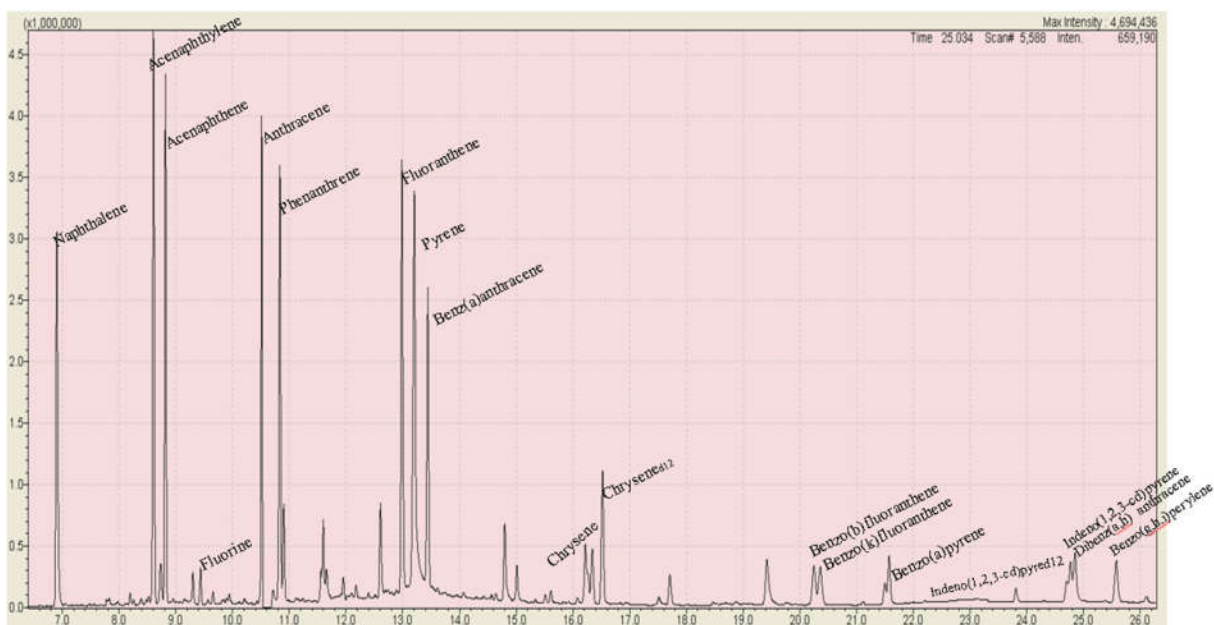

(a)

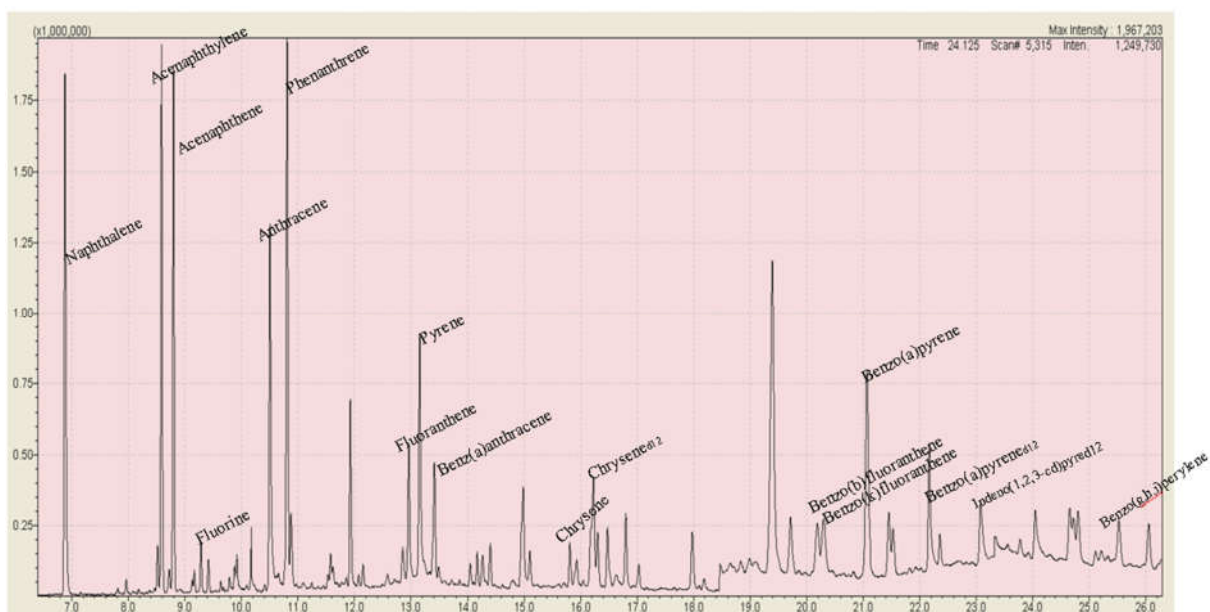

(b)

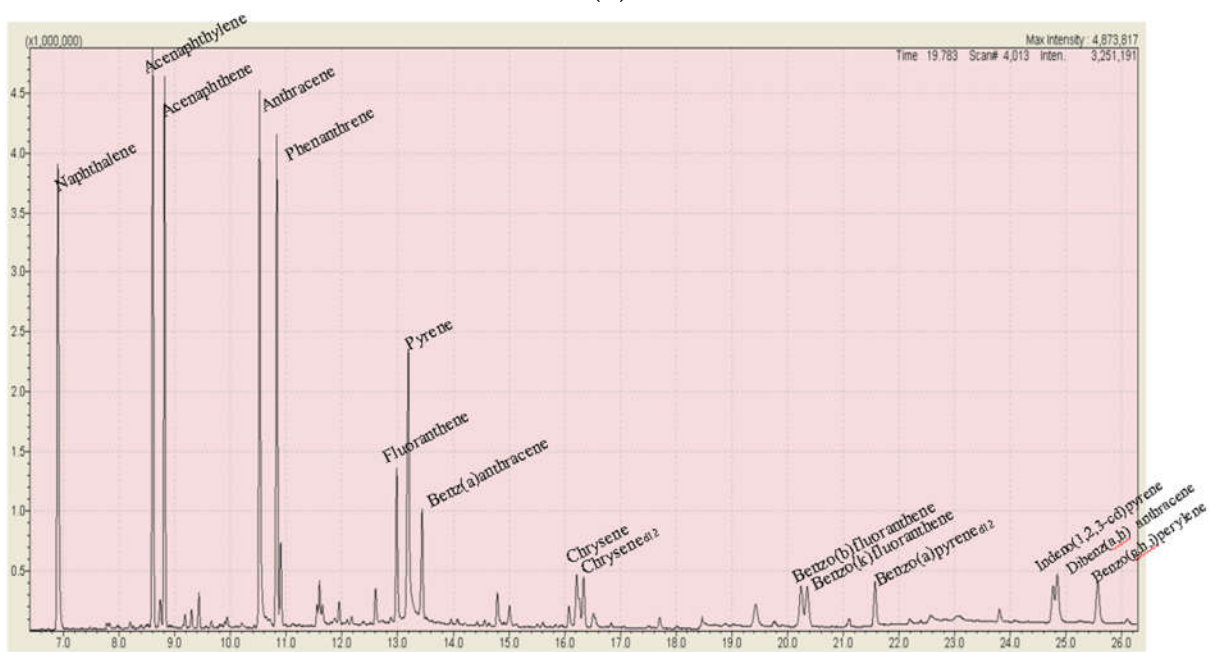

(c)

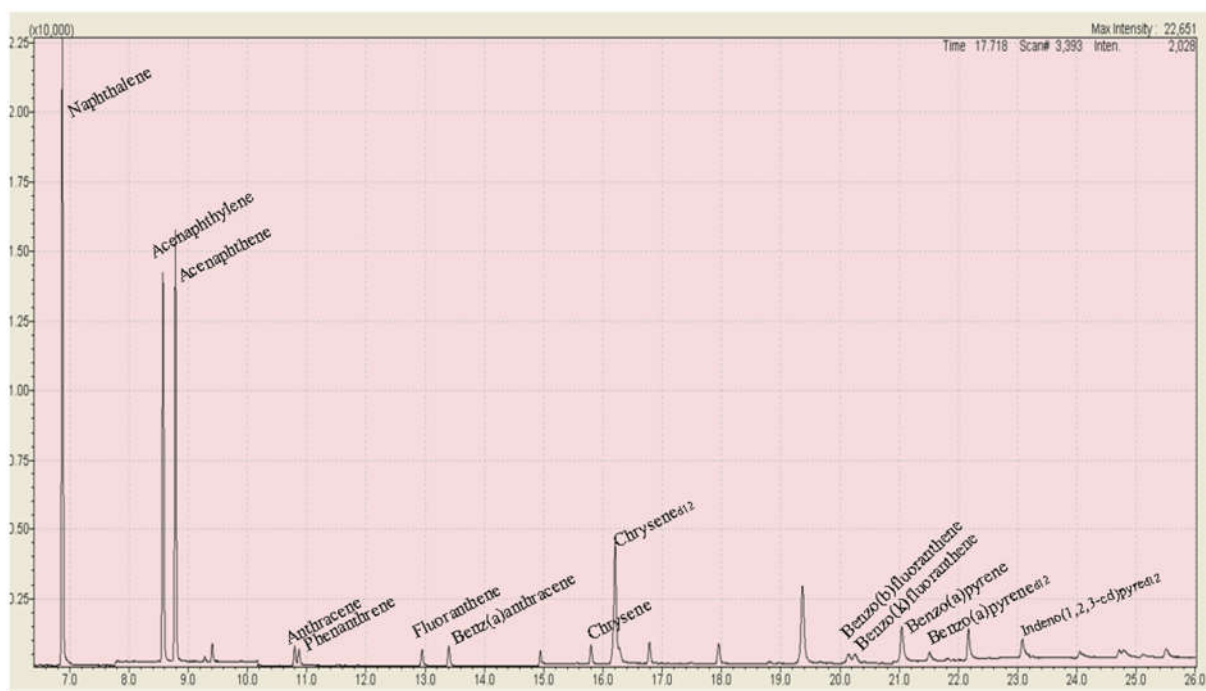

(d)

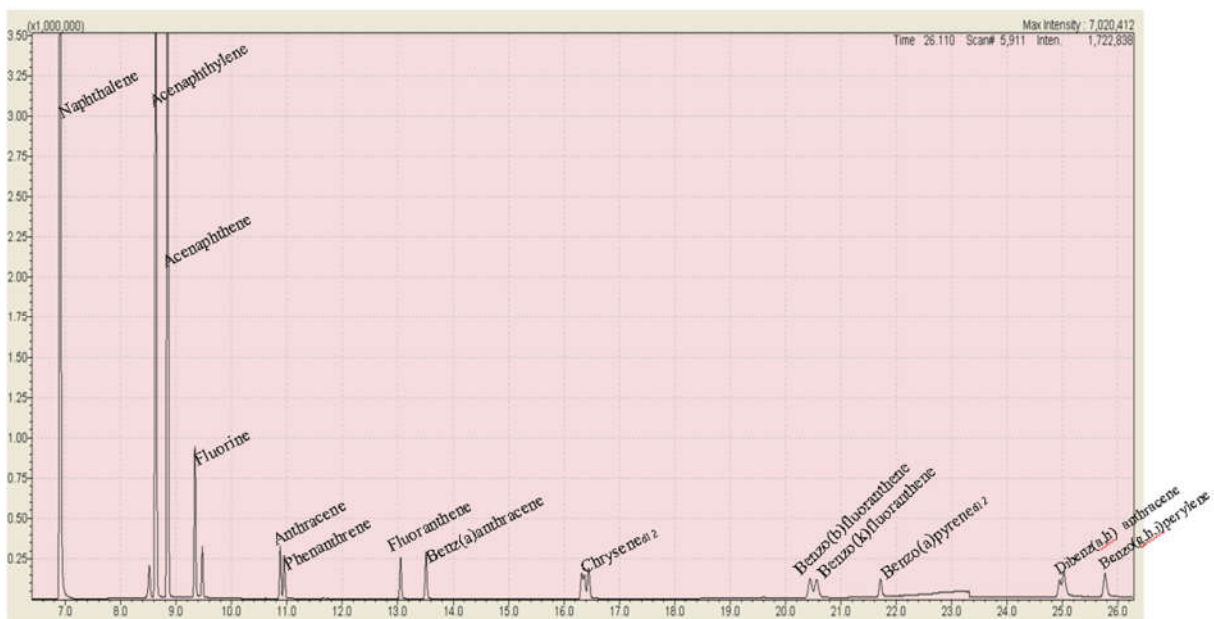

(e)



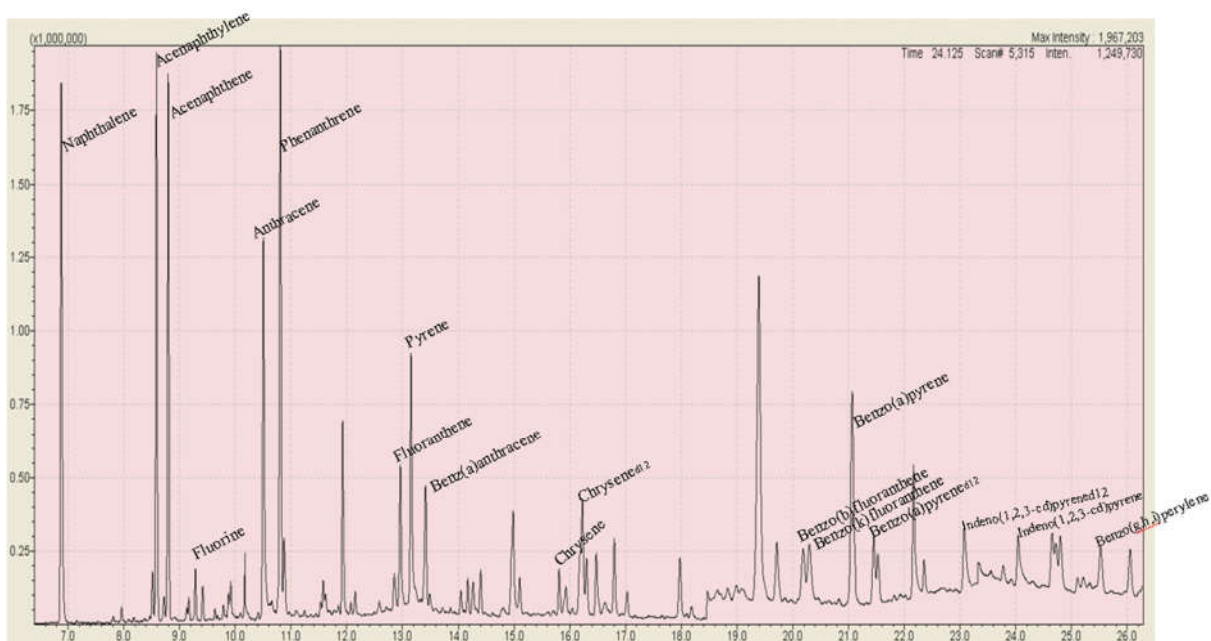

(f)

**Figures S1.** Chromatograms obtained in different phase of Sele River. (a) PAHs chromatogram identified in a water sample (Dissolved phase) of Sele River. (b) PAHs chromatogram identified in a Suspended particulate matter (SPM) sample of Sele River. (c) PAHs chromatogram identified in a water sample (Dissolved phase) of Sele River. (d) PAHs chromatogram identified in a Suspended particulate matter (SPM) sample of Sele River. (e) PAHs chromatogram identified in Sediment sample of Sele River. (f) PAHs chromatogram identified in Sediment sample of Sele River.
